# Supplementary material for: Selenium single-wavelength anomalous diffraction de novo phasing using an X-ray-free electron laser
Source: PubMed Central journal article supplement (PMC5097167; doi:10.1038/ncomms13388), 2016-11-04
Supplement: ncomms13388-s1.pdf [file ncomms13388-s1.pdf]

1 Supplementary Information

2

3

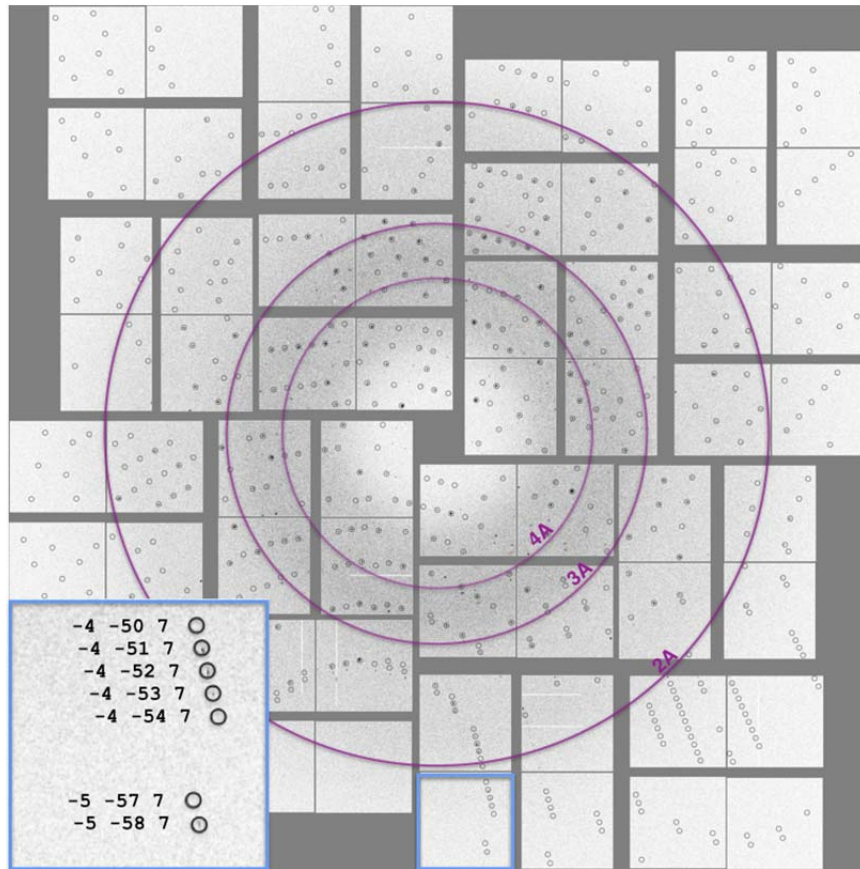

4

5

6 **Supplementary Figure 1** | Diffraction pattern with predicted Bragg peak positions

7 (inset) Indexed subpanel.

8

9

10

11

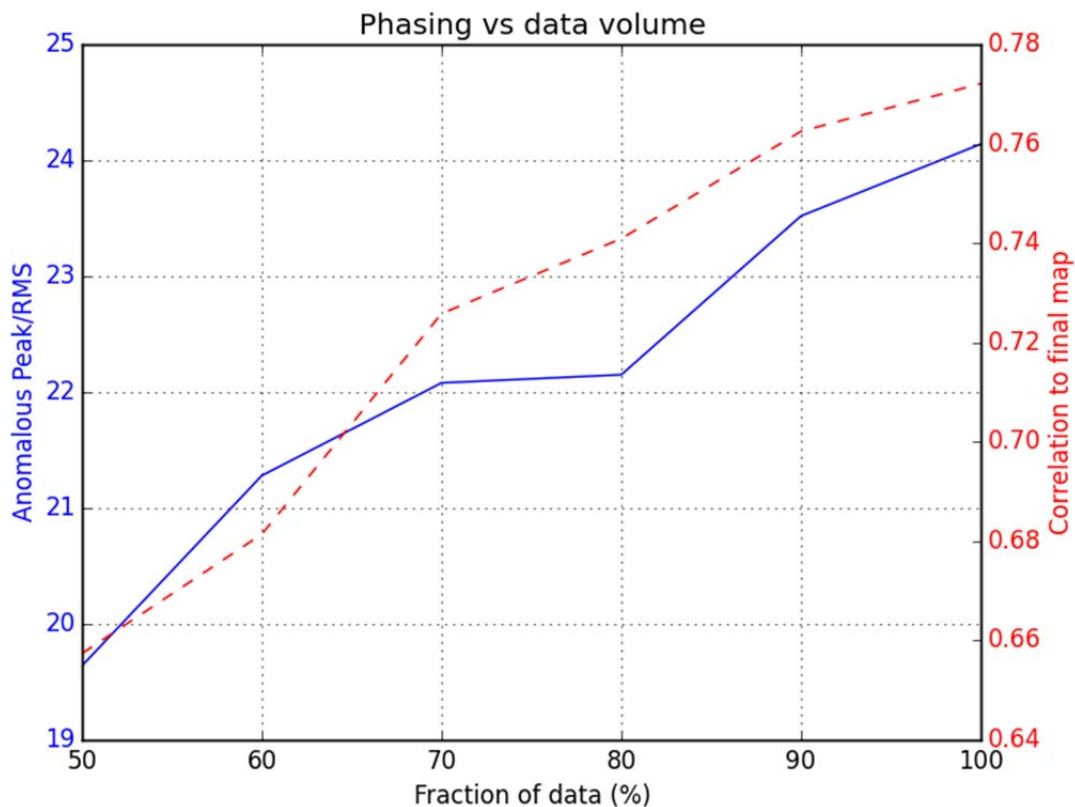

12  
 13  
 14  
 15  
 16  
 17  
 18  
 19  
 20  
 21  
 22  
 23

**Supplementary Figure 2:** Phasing vs data volume. The correlation to final map (red) and anomalous peak RMS (blue) shown as a function of data volume used for the Se-SAD data. Using 100% of the data, only ~0.1% of the 200,000 attempts to phase the data were successful. A key to successful phasing was finding the NCS operator, which only occurred when including the entire data set.

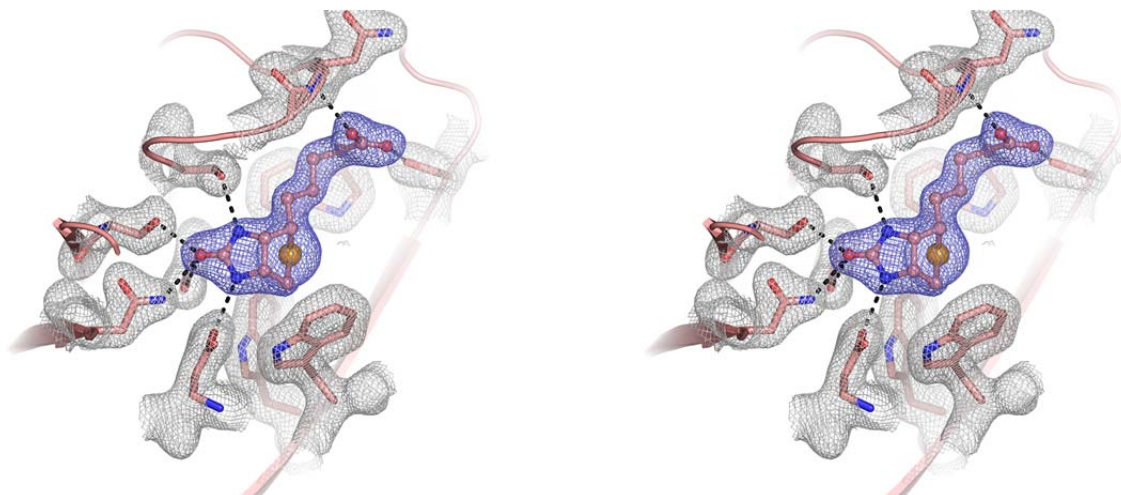

24  
25  
26  
27  
28  
29  
30  
31  
32  
33  
34  
35  
36  
37

**Supplementary Figure 3** | Stereo image of the electron-density map of the selenobiotin binding site. Final  $2F_o-F_c$  electron-density map of selenobiotin binding pocket contoured at the  $1\sigma$  level. Selenobiotin is shown in balls and sticks model and its electron-density colored in blue. The locations of active site residues are shown and their electron-density is colored in gray.

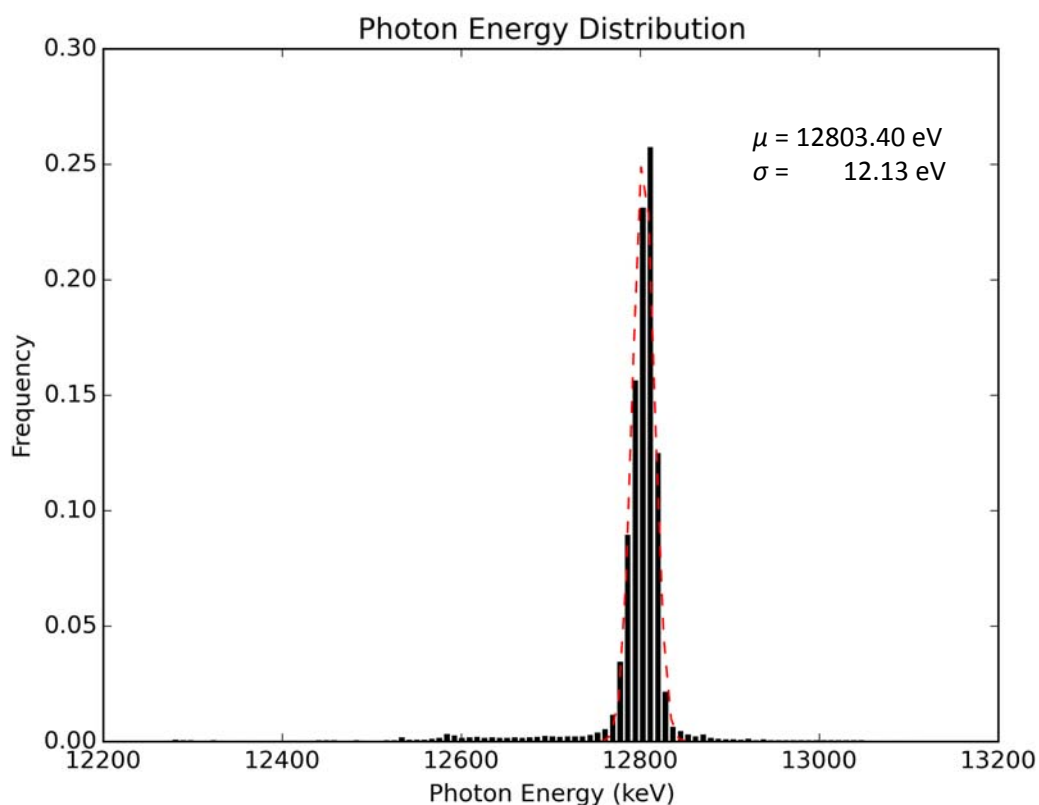

38  
39  
40  
41  
42  
43  
44  
45

**Supplementary Figure 4:** Photon Energy Distribution. The photon energy distribution for X-rays delivered to the CXI hutch while data were being recorded.

|                   | Number of frames      | Number of hits    | Number of indexed |
|-------------------|-----------------------|-------------------|-------------------|
|                   | Front / Back          | Front / Back      | Front / Back      |
| Transmission 100% | 2,520,580 / 1,174,470 | 324,803 / 369,691 | 125,755 / 88,289  |
| Transmission 50%  | 1,026,168 / 1,109,319 | 239,442 / 377,793 | 115,993 / 158,865 |
| Transmission 10%  | 1,041,249 / 730,055   | 111,444 / 144,620 | 43,188 / 27,104   |
| Total             | 7,601,841             | 1,567,793         | 559,194           |

46 Supplementary Table | Hit finding / indexing summary

47  
48

49 Supplementary Note 1

50 For the large data sets acquired in SFX, the metric  $R_{\text{split}}$  is used to test the internal  
51 consistency of the data<sup>1</sup> by calculating the R-factor,

52

$$R_{\text{split}} = \frac{1}{\sqrt{2}} \frac{\sum_{hkl} [I_{hkl}^{\text{subset}_1} - I_{hkl}^{\text{subset}_2}]}{\sum_{hkl} \left[ \frac{I_{hkl}^{\text{subset}_1} + I_{hkl}^{\text{subset}_2}}{2} \right]}$$

53

54 between the data sets. For the final data set used to phase the Se-B SA structure with  
55 resolution cutoff at 1.9 Å, the  $R_{\text{split}}$  was calculated to be 4.8%, showing good internal  
56 consistency of the data.

57

58

59

60

61

## References

62

- 63 1. White TA, *et al.* CrystFEL: a software suite for snapshot serial crystallography.  
64 *Journal of Applied Crystallography* **45**, 335-341 (2012).

65

66
